# Supplementary material
Source: PubMed Central journal article supplement (PMC4851304)
Supplement: supp_116.069419_Supplemental_69419.pdf [file supp_116.069419_Supplemental_69419.pdf]

## Supplemental Materials

**Title:** glycyrrhizin protects against acetaminophen-induced acute liver injury via alleviating TNF $\alpha$ -mediated apoptosis;

**Authors:** Tingting Yan, Hong Wang, Min Zhao, Tomoki Yagai, Yingying Chai, Kristopher W. Krausz, Cen Xie, Xuefang Cheng, Jun Zhang, Yuan Che, Feiyan Li, Yuzheng Wu, Chad N. Brocker, Frank J. Gonzalez, Guangji Wang, Haiping Hao;

**Journal title:** Drug Metabolism and Disposition

### Supplemental Table 1. List of mouse primers:

| Primers                      | Forward 3'-5'         | Reverse 5'-3'           |
|------------------------------|-----------------------|-------------------------|
| <i>Gapdh</i>                 | TTGAGGTCAATGAAGGGGTC  | TCGTCCCGTAGACAAAATGG    |
| <i>Ripk3</i>                 | GGTGGTGCTACCAAGGAGTT  | GAGATGGAAGACACGGCACT    |
| <i>Mkl</i>                   | ATAGAGGAGAGTATCACA    | AATATACGCAAGATGTTG      |
| <i>Il6</i>                   | CACAAGTCCGGAGAGGAGAC  | CAGAATTGCCATTGCACAAC    |
| <i>Il1<math>\beta</math></i> | CCTCTGCCAAGTCA-GGTCTC | GAATGTGCCACGGTTTTCTT    |
| <i>Tnfa</i>                  | GAGAGATTGGCTGCTGGAAC  | TGGAGACCATGATGACCGTA    |
| <i>Cyp2e1</i>                | GACCACCAGCACAACCTCTGA | CCCAATCACCCCTGTCAATTT   |
| <i>Cyp3a11</i>               | AGCAGGGATGGACCTGG     | CGGTAGAGGAGCACCAA       |
| <i>Cyp1a2</i>                | TCCTGGACTGACTCCCACAAC | GAACGCCATCTGTACCACTGAA  |
| <i>Bcl2a1c</i>               | CCTGGCTGAGCACTACCTTCA | TGAACGGAGAAAGCAACTCTTTG |

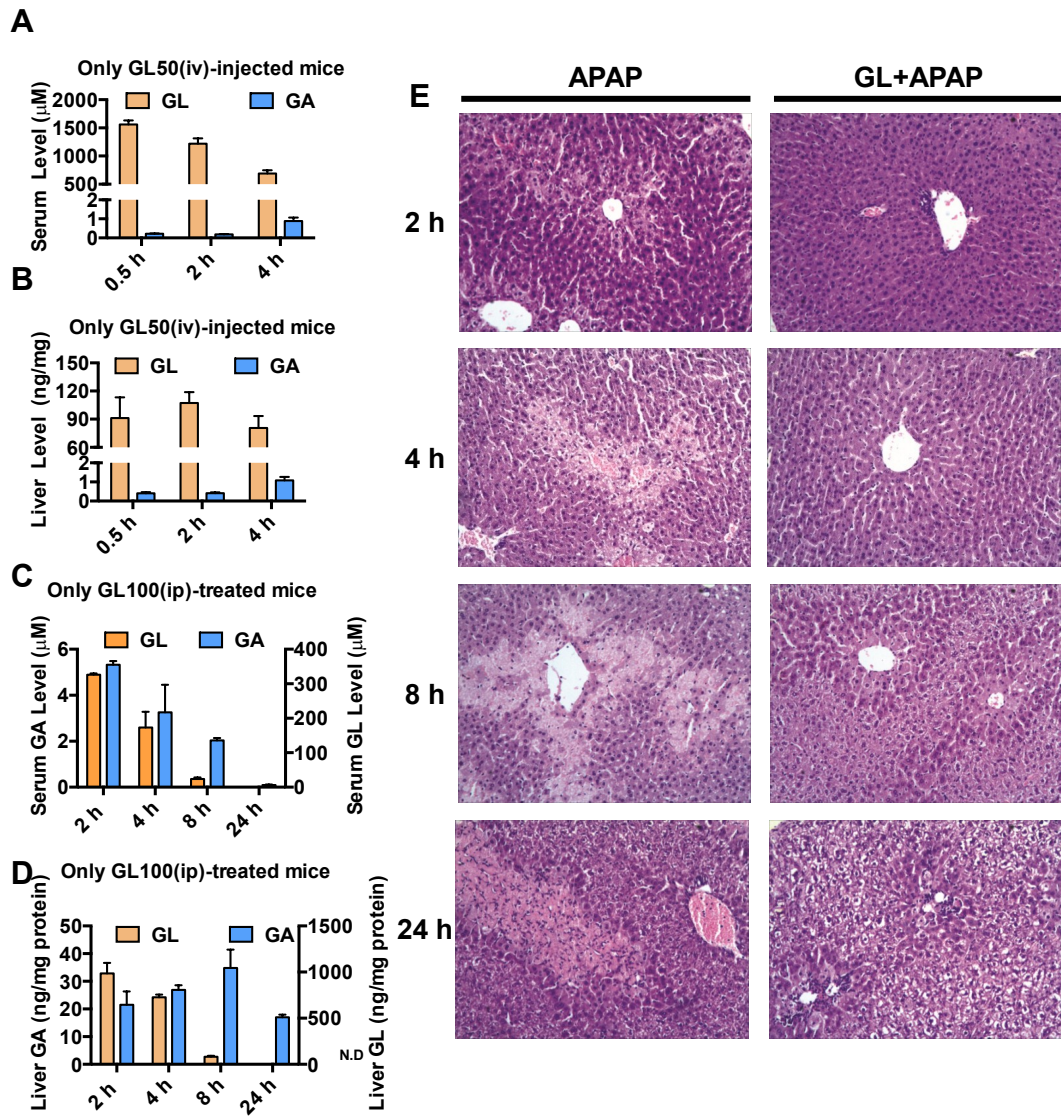

**Supplemental Figure 1. Time course of GL and GA in only GL-treated mice and histological analyses of APAP or GL/APAP-treated livers.** (A), serum GL and GA in only GL 50 mg/kg (iv)-injected mice. (B), liver GL and GA in only GL 50 mg/kg (iv)-injected mice. n=3-6 mice for each group; (C), serum GL and GA in only GL 100 mg/kg (ip)-treated mice. (D), liver GL and GA in only GL 100 mg/kg (ip)-treated mice. (E), H & E-stained liver sections of saline/APAP and GL/APAP-treated mice original magnification, 20×. APAP, saline/APAP-treated mice; GL+APAP, GL 100 mg/kg /APAP-treated mice. n=3 mice in each group.

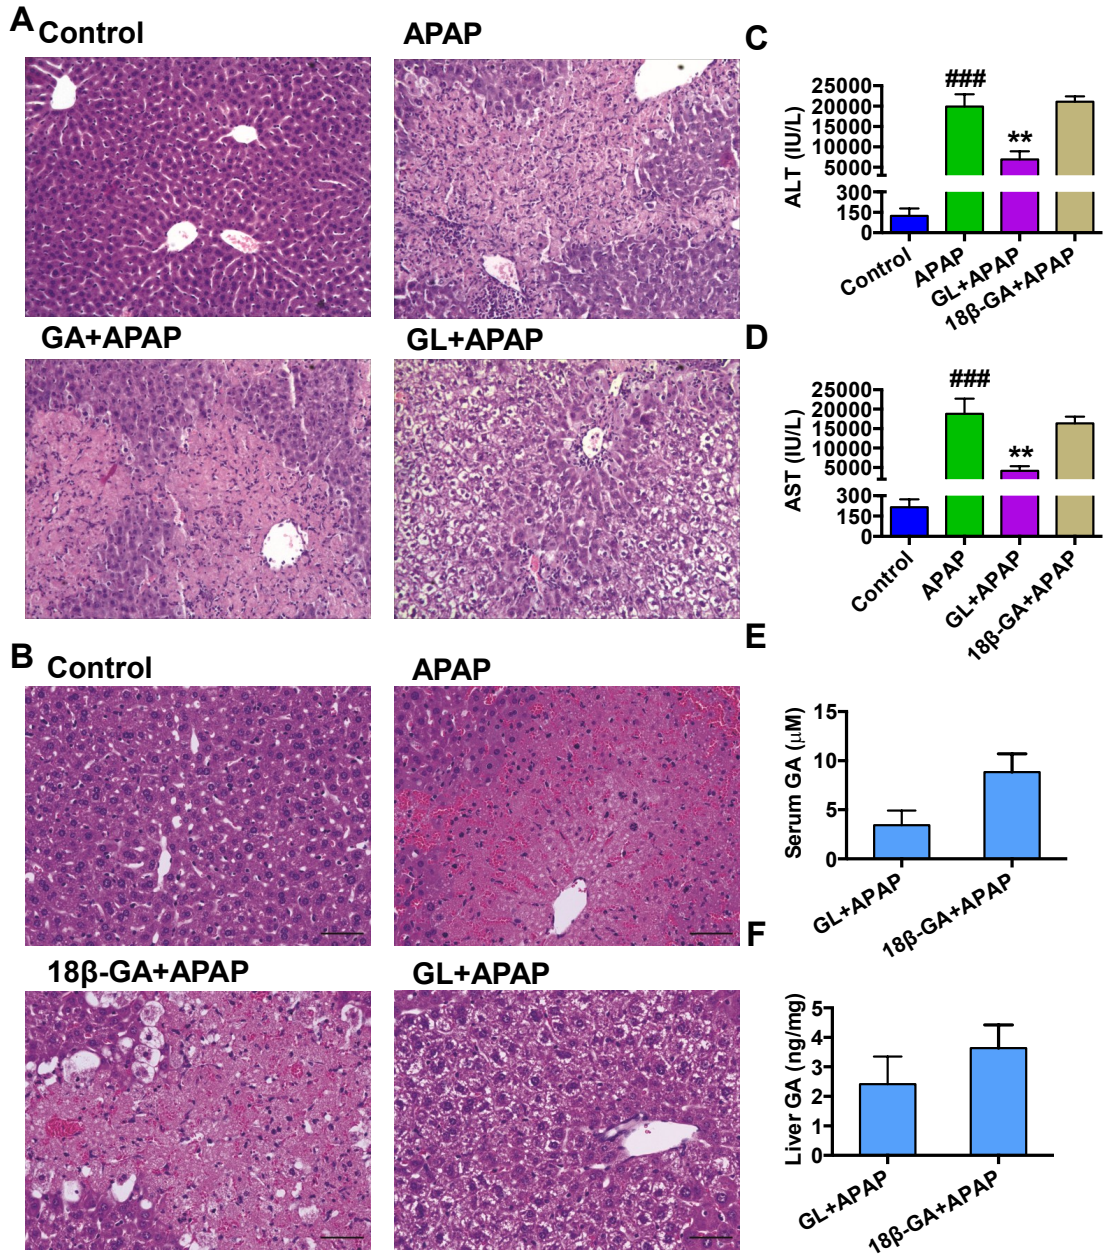

**Supplemental Figure 2. GA/18β-GA fails to prevent APAP-induced liver injury.** (A and B), H & E-staining of liver sections in GA/APAP-treated mice (A) and 18β-GA/APAP-treated mice (B) at 24 h after APAP challenge, original magnification, 20×. (C and D), Serum ALT and AST levels. (E and F), GA exposure in serum (E) and in liver (F) in 18β-GA/APAP-treated mice. Data

are expressed as mean  $\pm$  SEM, and n=4-6 for both animal experiments. Control, saline-treated mice; APAP, saline-treated APAP-overdosed mice; GA+APAP, GA 50 mg/kg (ip)-treated APAP-overdosed mice; GL+APAP, GL 50 mg/kg (ip)-treated APAP-overdosed mice; 18 $\beta$ -GA+APAP, 18 $\beta$ -GA 30 mg/kg (ip)-treated APAP-overdosed mice. ####p<0.001 versus control mice. \*\*p<0.01 versus APAP-overdosed mice.

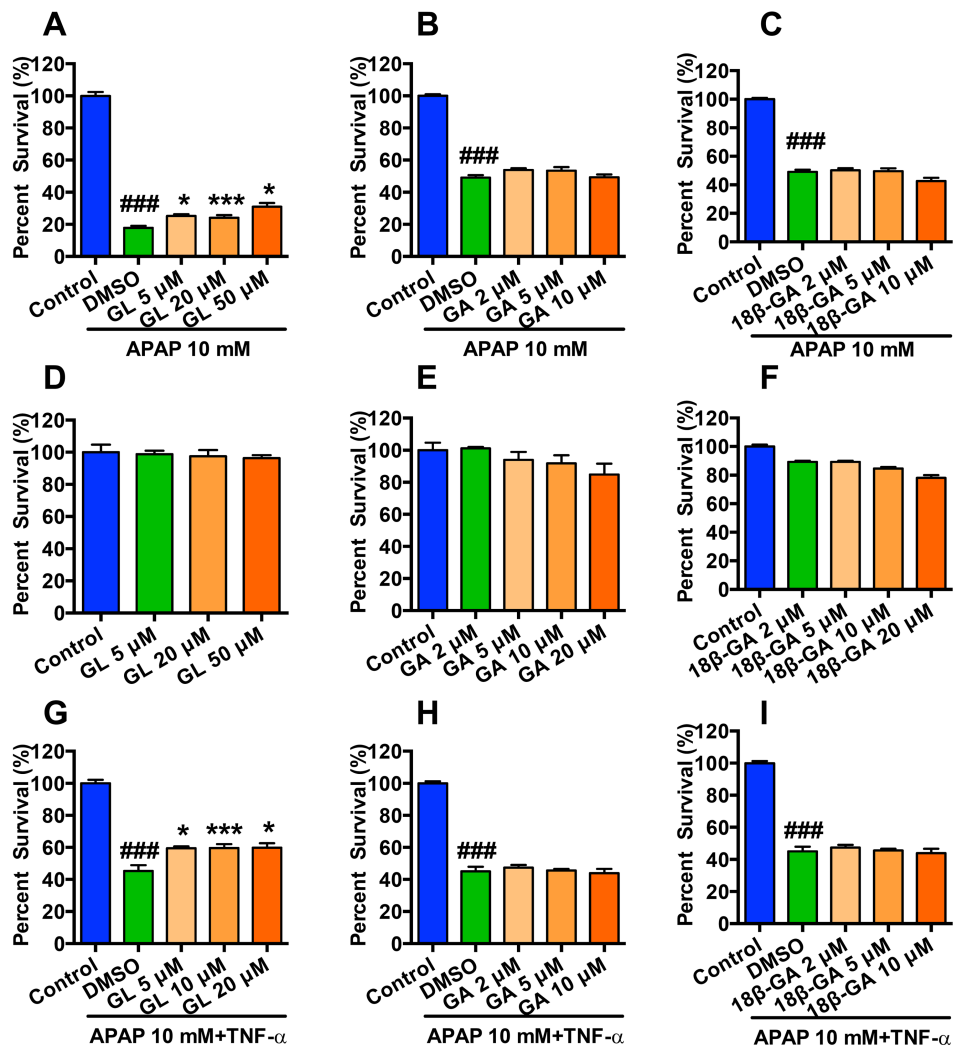

**Supplemental Figure 3. GL, and not GA and 18 $\beta$ -GA, ameliorates APAP or TNF- $\alpha$ /APAP-induced hepatocyte damage.** (A, B and C), the effect of GL (A), GA (B) and 18 $\beta$ -GA (C) in APAP 10 mM-caused LO2 cell death. (D, E and F), cell toxicity of GL (E), GA (F), and 18 $\beta$ -GA. (G, H and I), the effect of GL (G), GA (H), and 18 $\beta$ -GA (I) in TNF- $\alpha$ /APAP-induced LO2 cell death in TNF- $\alpha$ /APAP-induced LO2 cell death. Data are expressed as mean  $\pm$  SEM, and n=5-6 for each group. #p<0.05, ##p<0.01 and ###p<0.001 versus 0.1% DMSO-treated control LO2 cells. \*p<0.05, \*\*p<0.01 and \*\*\*p<0.001 versus 0.1% DMSO/APAP-treated LO2 cells.



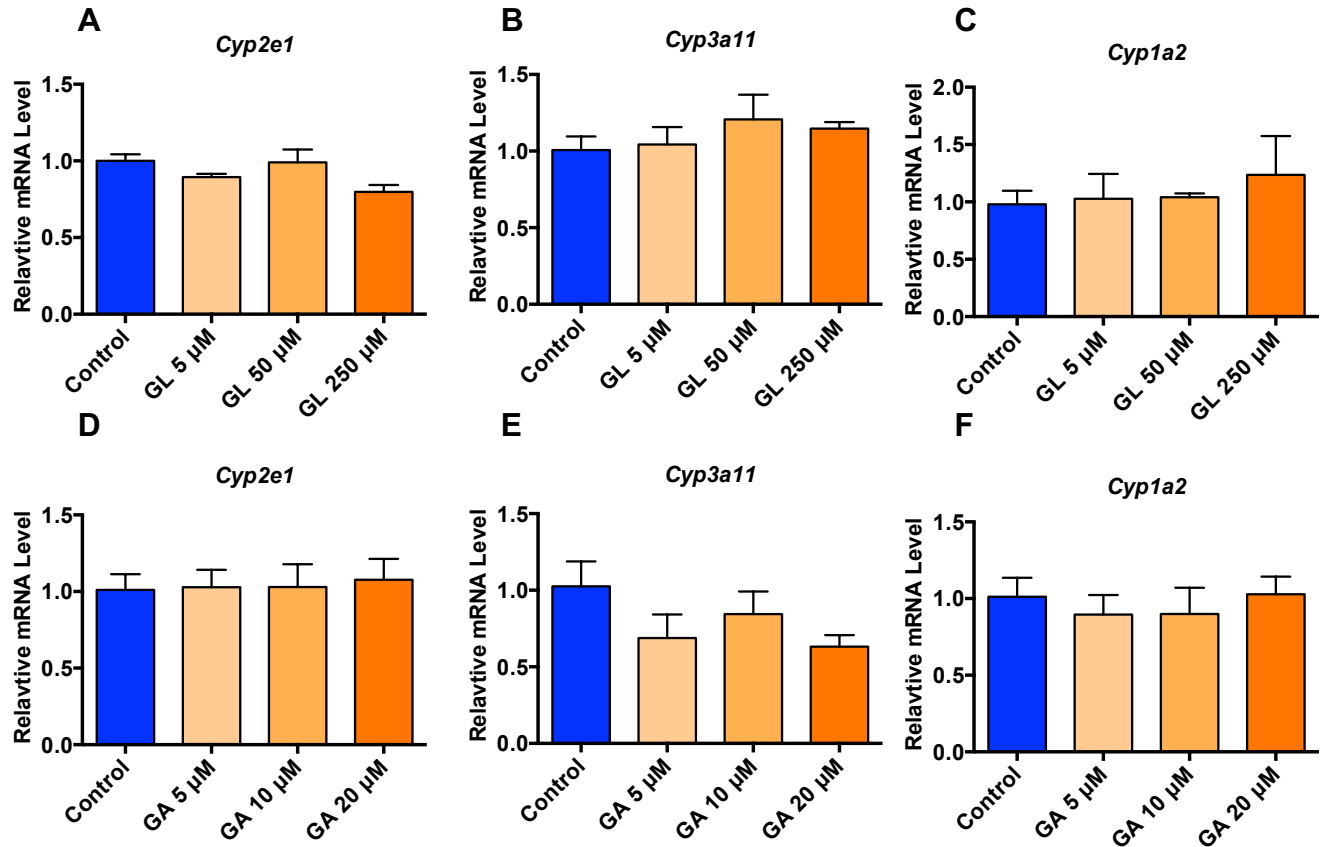

**Supplemental Figure 4. GL and GA have no significant effect in *Cyp2e1*, *Cyp3a11*, and *Cyp1a2* expression in mouse primary hepatocytes.** (A, B and C), the effect of GL in mouse *Cyp2e1*, *Cyp3a11*, and *Cyp1a2* expression. (D, E and F), the effect of GA in mouse *Cyp2e1*, *Cyp3a11*, and *Cyp1a2* expression. Data are expressed as mean  $\pm$  SEM, and n=5-6 for each group. C57BL/6 mice as isolated by 3-step treated with 0.1% DMSO (Control) or various concentrations of GL, GA/18 $\beta$ GA for 24 h.

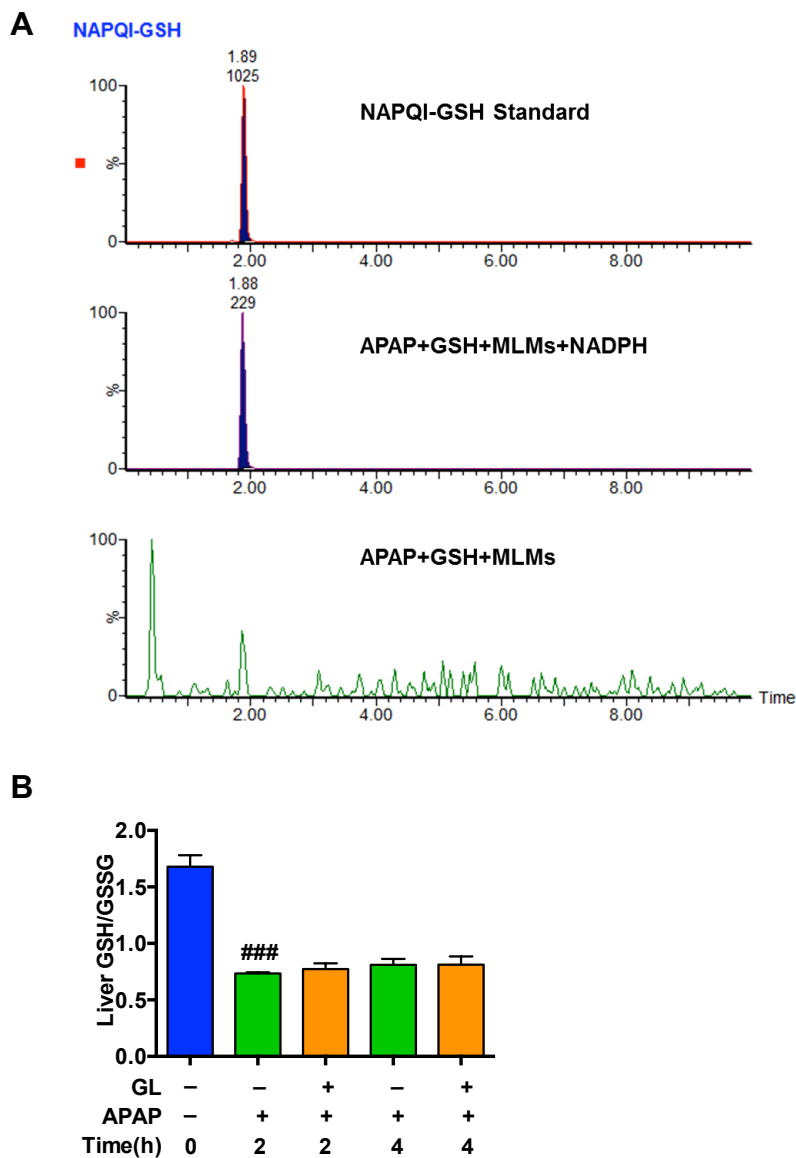

**Supplemental Figure 5. GL fails to rescue APAP-induced GSH depletion in liver.** (A), Representative chromatograms (peak at  $m/z$  457.1393) of NAPQI-GSH authentic standard, incubation product from APAP/MLMs incubation system, and incubation product from APAP/MLMs incubation system without adding NADPH. (B), Hepatic GSH/GSSG ratio of saline or GL treated mice after APAP challenge at 2 h and 4 h.

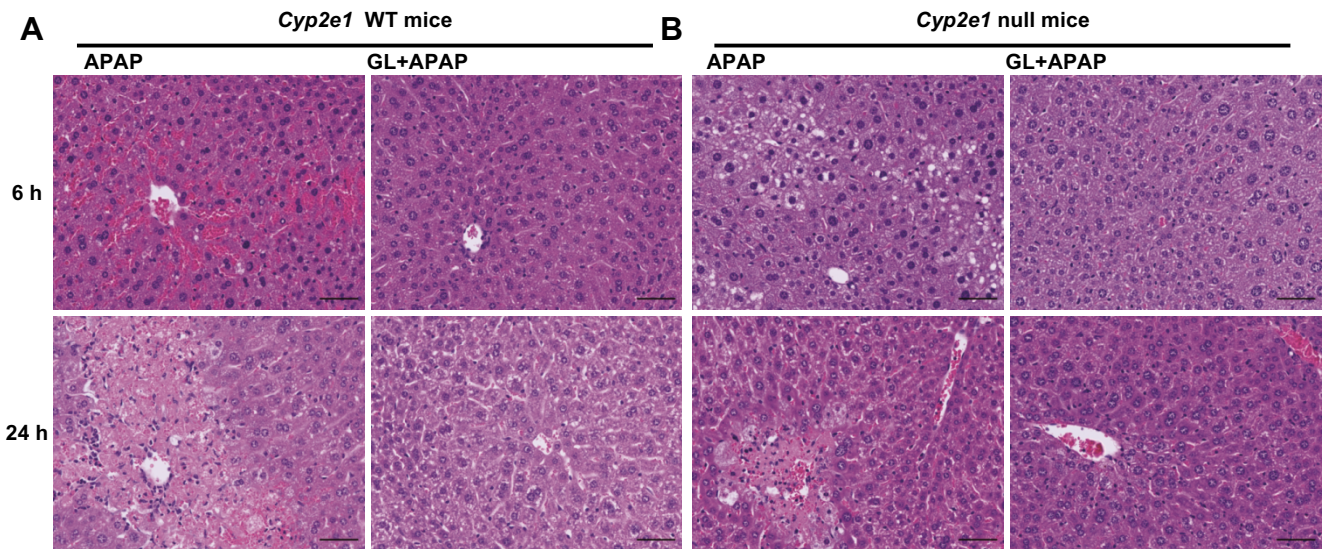

**Supplemental Figure 6. GL rescues APAP-induced histological injury in both wild-type and *Cyp2e1*-null mice.** (A), H & E staining of saline/APAP and GL/APAP-treated livers in wild-type mice at 6 h and 24 h. (B), H & E staining of saline/APAP and GL/APAP-treated livers in *cyp2e1*-null mice at 6 h and 24 h. APAP, saline/APAP-treated mice; GL+APAP, GL 50 mg/kg/APAP-treated mice. Original magnification, 20 $\times$ , and black scale bar, 50  $\mu$ m.



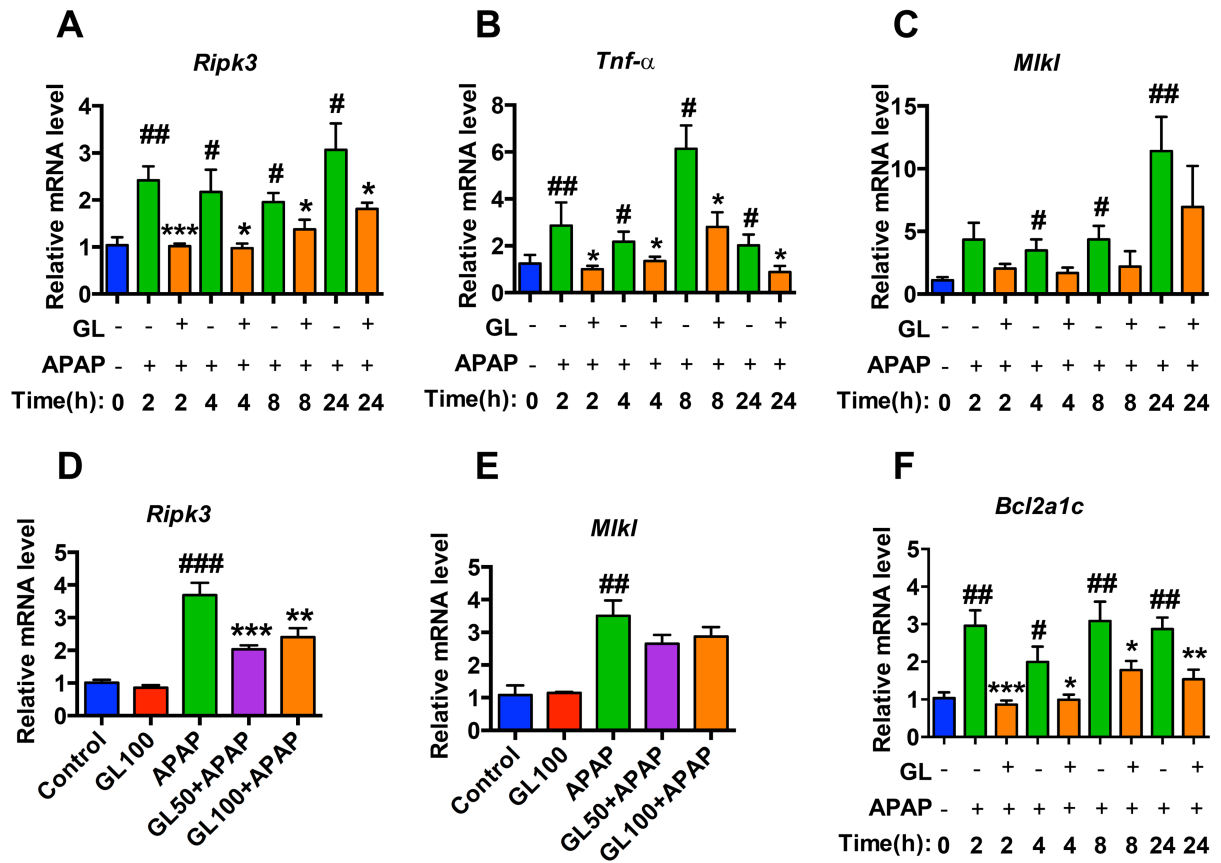

**Supplemental Figure 7. The effect of APAP and GL in Ripk3 signaling.** (A), time course of *Ripk3* mRNA levels. (B), time course of *Tnfa* mRNA levels. (C), time course of *Mkl1* mRNA levels. (D and E), effect of GL 50 mg/kg and GL 100 mg/kg in *Ripk3* (D) and *Mkl1* (E) mRNA level at 24 h after APAP challenge. (F), Time course of *Bcl2a1c* mRNA levels. Data are expressed as mean  $\pm$  SEM, and n=5-8 mice for each group. Control, saline-treated control mice; GL100, only GL 100 mg/kg-treated mice; APAP, saline/APAP-treated mice; GL50+APAP, GL 50 mg/kg-treated APAP-overdosed mice; GL100+APAP, GL 100 mg/kg-treated APAP-overdosed mice. #p<0.05, ##p<0.01 and ###p<0.001 versus control mice. \*p<0.05, \*\*p<0.01 and \*\*\*p<0.001 versus APAP-overdosed mice.

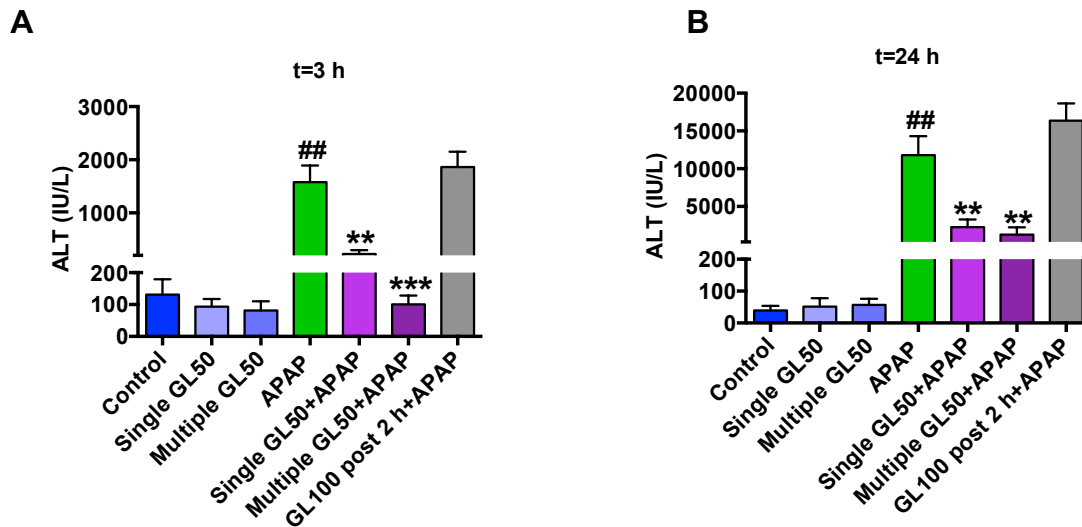

**Supplemental Figure 8. Intravenous injection of GL at 2 h post APAP challenge fails to combat APAP-induced liver injury, while both multiple injections of GL and single injection of GL via intraperitoneal injection significantly prevent APAP-induced toxicity.**

(A), Serum ALT levels at 2 h after APAP challenge. (B), Serum ALT levels at 24 h after APAP challenge. Control, saline-treated mice; Single GL50, only single GL 50 mg/kg-treated mice; APAP, saline/APAP-treated mice; Single GL50+APAP, single injection of GL 50 mg/kg (ip)/APAP-treated mice; Multiple GL50+APAP, multiple injections of GL 50 mg/kg (ip)/APAP-treated mice; GL100 post 2 h+APAP, mice were intravenously injected with 100 mg/kg of GL at 2 h post APAP treatment. Data are expressed as the mean  $\pm$  SEM, n=5 mice in each group. #P<0.05, ##P<0.01 and ###P<0.001 versus control mice. \*P<0.05, \*\*P<0.01 and \*\*\*P<0.001 versus APAP-overdosed mice.
